# Supplementary material for: Photocatalytic properties of Pd/TiO2 nanosheets for hydrogen evolution from water splitting
Source: Royal Society of Chemistry journal article supplement (doi:10.1039/c6ra10408h), 2016-01-01
Supplement: c6ra10408h1.pdf [file c6ra10408h1.pdf]

## Supporting Information

### Photocatalytic properties of Pd/TiO<sub>2</sub> nanosheets for hydrogen evolution from water splitting

Junjie Wu, Shuanglong Lu, Danhua Ge, Longzhu Zhang, Wei Chen and Hongwei Gu\*

*Key Laboratory of Organic Synthesis of Jiangsu Province, College of Chemistry, Chemical Engineering and Materials Science & Collaborative innovation Center of Suzhou Nano Science and Technology,*

*Soochow University, Suzhou, China 215123*

*Fax : (+86)-512-65880307; phone: (+86)- 512-65880307; E-mail: hongwei@suda.edu.cn*

Table S1. Physical properties of the samples.

| Samples | Amount of Pd (At.%) | Average size of Pd NPs <sup>a</sup> (nm) |
|---------|---------------------|------------------------------------------|
| W0      | 0                   | 0                                        |
| W1      | 0.07                | ~5.8                                     |
| W2      | 0.10                | ~6.3                                     |
| W3      | 0.18                | ~6.5                                     |
| W4      | 0.21                | ~7.1                                     |
| W5      | 0.28                | ~8.9                                     |

a. Average size of Pd NPs was measured by Dynamic Light Scattering (DLS).

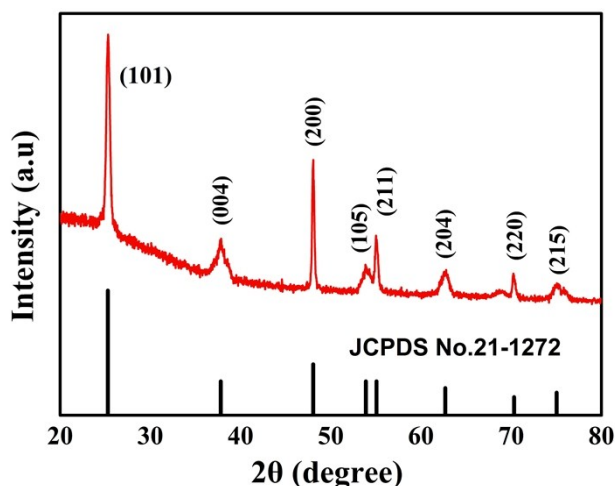

Figure S1. XRD patterns of pure TiO<sub>2</sub> nanosheets.

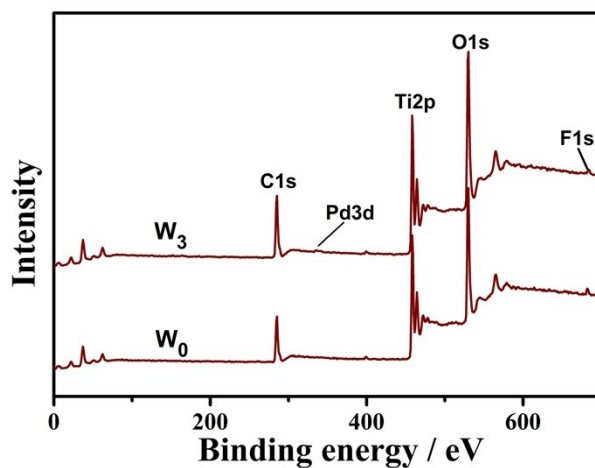

**Figure S2.** XPS spectra of the Pd/TiO<sub>2</sub> nanosheets (0.18 At.%, W3)

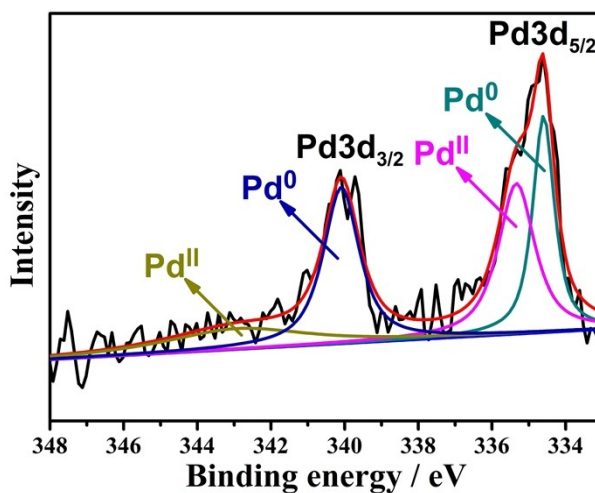

**Figure S3.** The high-resolution XPS spectra of Pd 3d for W3.

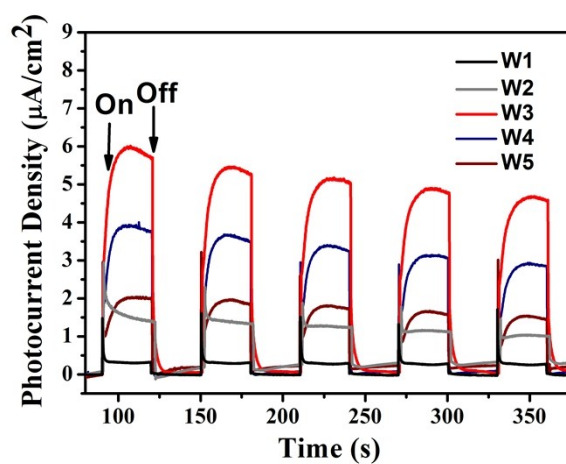

**Figure S4.** The on-off photocurrent for W1, W2, W3, W4 and W5 as photoanodes, in 0.1 M KCl solution, respectively.

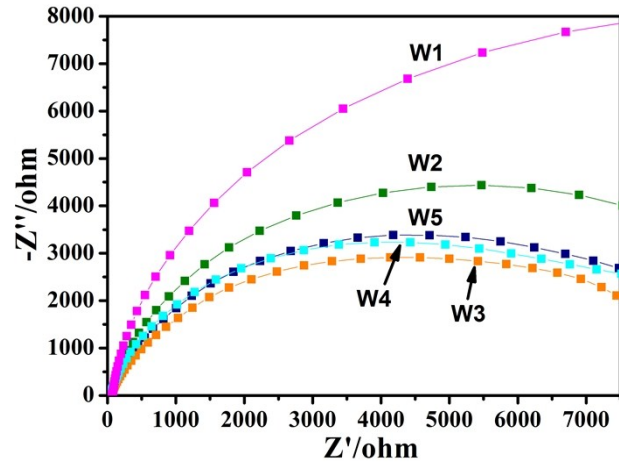

**Figure S5.** Nyquist plot of the electrodes based on W1, W2, W3, W4 and W5 in the dark.

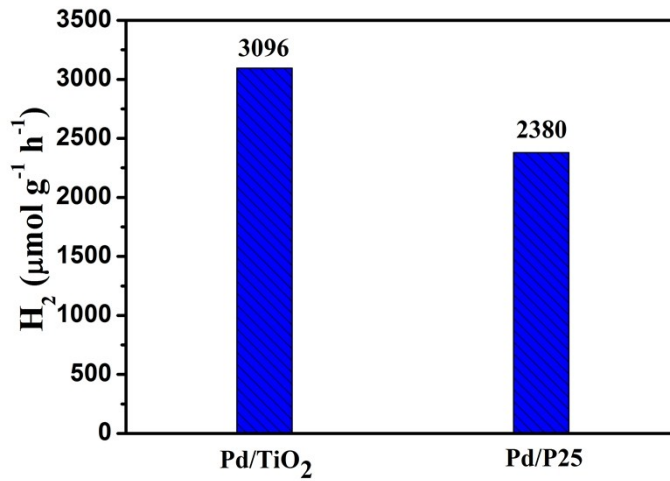

**Figure S6.** A comparison of photoactivity of Pd/TiO<sub>2</sub> nanosheets and Pd/P25.

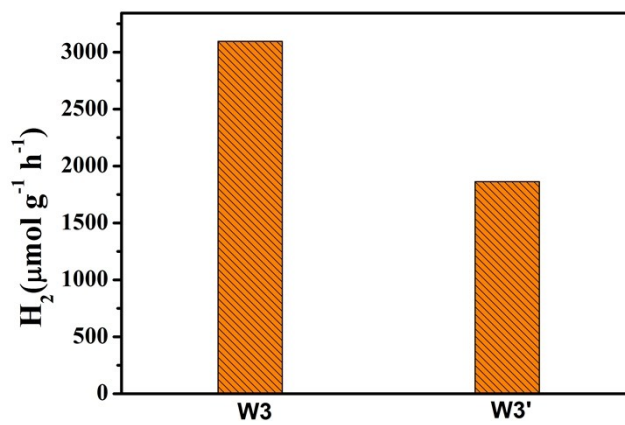

**Figure S7.** Comparison of  $H_2$  evolution rate for W3 and W3' (Pd NPs on fluorine-free TiO<sub>2</sub> nanosheets).

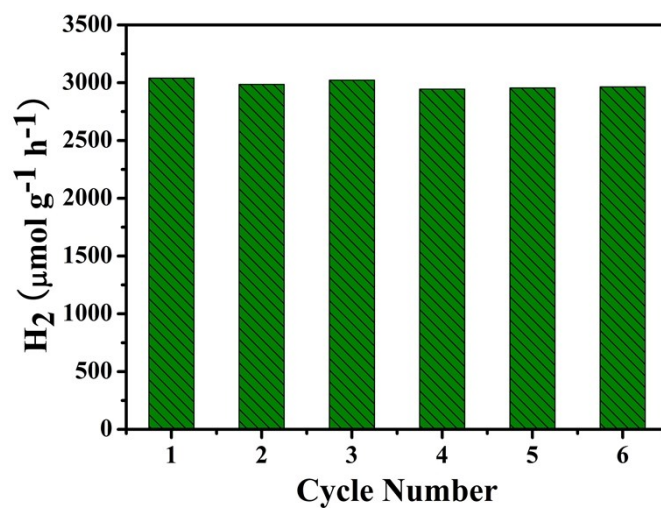

**Figure S8.** Photocatalytic stability of Pd/TiO<sub>2</sub> nanosheets for H<sub>2</sub> evolution from water splitting under irradiation from 300 W Xe lamp.
